# Supplementary material
Source: HighWire-hosted journal article supplement (doi:10.1101/rna.078951.121)
Supplement: Supplemental_Fig_S1.pdf [file Supplemental_Fig_S1.pdf]

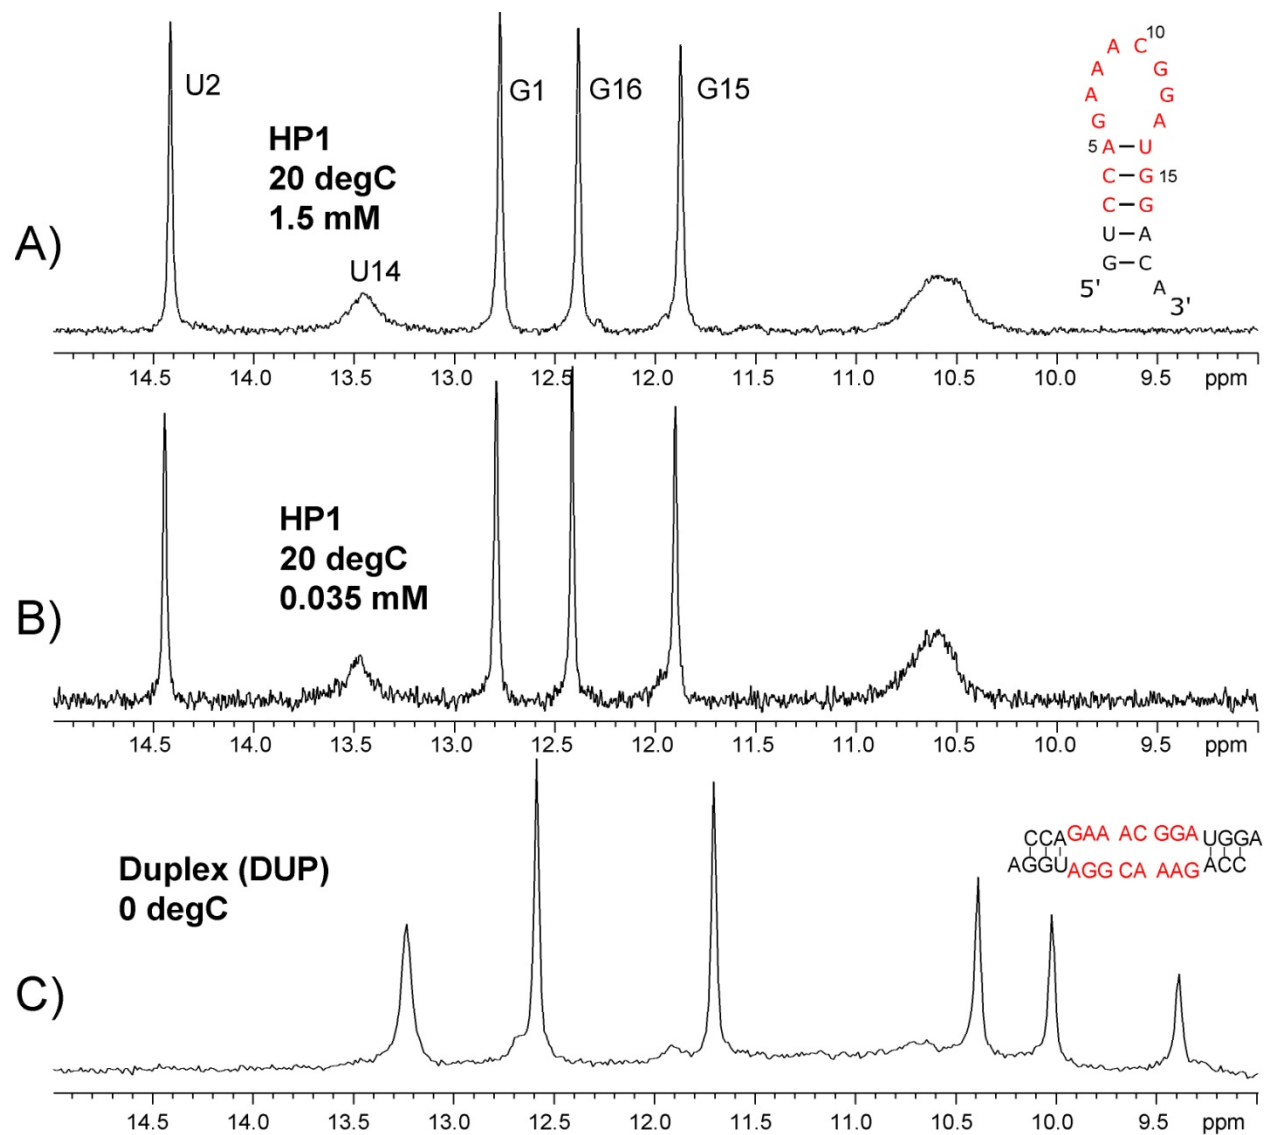

Supplemental Figure S1) (a) and (b) NMR spectra of HP1 at (a) 1.5 mM and (b) 0.035 mM RNA concentration at 20 °C. The buffer contains 2.0 mM potassium phosphate and 0.05 mM EDTA, pH 6.2. (c) NMR spectrum of r(CCAGAAACGGAUGGA)<sub>2</sub> in 80 mM KCl, 20 mM potassium phosphate, and 0.05 mM Na<sub>2</sub>EDTA, pH 6.2 (Kauffmann, et al., 2017). The three peaks upfield from 10.5 ppm are typical of the three consecutive sheared GA pairs in the duplex loop.
