# Supplementary material
Source: HighWire-hosted journal article supplement (doi:10.1101/rna.078951.121)
Supplement: Supplemental_Table_S1.docx [file Supplemental_Table_S1.docx]

**Supplemental Table S1)**

Chemical shifts of HP1 at 25 °C in D2O, except imino protons (H1/3) at 0 °C in H2O.

| **Res.** | **Atom ID** | | | | | | | | | | |
| --- | --- | --- | --- | --- | --- | --- | --- | --- | --- | --- | --- |
|  | H1' | H2' | H3' | H4' | H2/5 | H6/8 | H1/3  (0 °C) | P | C1' | C2/5 | C6/8 |
| G1 | 5.90 | 4.79 | 4.56 | 4.45 | - | 8.15 | 12.78 | - | 93.39 | - | 138.91 |
| U2 | 5.63 | 4.59 | 4.56 | - | 5.10 | 7.96 | 14.52 | - | 94.04 | 102.50 | 142.64 |
| C3 | 5.57 | 4.36 | 4.45 | 4.51 | 5.68 | 7.87 | - | - | 94.29 | 97.89 | 141.82 |
| C4 | 5.39 | 4.51 | 4.53 | 4.38 | 5.50 | 7.69 | - | -3.95 | 94.15 | 98.22 | 141.20 |
| A5 | 5.81 | 4.51 | - | - | 7.23 | 7.83 | - | -4.05 | 93.44 | 153.16 | 139.55 |
| G6 | 5.30 | 4.44 | - | - | - | 7.50 | - | - | 90.95 | - | 138.01 |
| A7 | 5.55 | 4.52 | 4.60 | 4.38 | 7.62 | 7.94 | - | - | 91.77 | 154.46 | 141.06 |
| A8 | 5.64 | 4.41 | 4.64 | 4.38 | 7.85 | 8.05 | - | - | 91.26 | 155.26 | 141.17 |
| A9 | 5.71 | 4.61 | - | - | 7.95 | 8.03 | - | -3.85 | 89.79 | 155.16 | 141.89 |
| C10 | 5.81 | 4.22 | 4.48 | 4.31 | 5.84 | 7.64 | - | - | 91.13 | 99.17 | 143.56 |
| G11 | 5.52 | 4.62 | - | - | - | 7.81 | - | -3.78 | 90.88 | - | 139.80 |
| G12 | 5.73 | 4.83 | 4.84 | 4.57 | - | 7.93 | - | - | 89.76 | - | 140.14 |
| A13 | 5.89 | 4.78 | 4.56 | 4.40 | 8.05 | 8.12 | - | -2.64 | 91.73 | 154.96 | 141.40 |
| U14 | 4.90 | 4.47 | - | - | 5.72 | 7.73 | 13.55 | - | 93.25 | 104.70 | 142.08 |
| G15 | 5.81 | 4.61 | - | - | - | 7.75 | 11.87 | - | 92.64 | - | 136.98 |
| G16 | 5.64 | 4.51 | - | - | - | 7.23 | 12.43 | - | 93.04 | - | 136.34 |
| A17 | 5.92 | 4.52 | 4.56 | 4.46 | 7.77 | 7.76 | - | - | 93.06 | 154.16 | 139.31 |
| C18 | 5.34 | 4.29 | 4.30 | 4.35 | 5.10 | 7.25 | - | - | 93.86 | 97.55 | 140.10 |
| A19 | 5.99 | 4.05 | 4.29 | 4.23 | 7.46 | 8.03 | - | -3.73 | 91.82 | 154.66 | 140.41 |
