# Supplementary material
Source: HighWire-hosted journal article supplement (doi:10.1101/rna.078951.121)
Supplement: Supplemental_Table_S2.docx [file Supplemental_Table_S2.docx]

**Supplemental Table S2)**

Chemical shifts of HP2-PK and HP2-HP at 20C in 95%H2O/5%D2O, except imino protons (H1/3) at 0°C. Highlighted regions have similar chemical shifts and are also expected to have identical secondary structure in HP2-PK and HP2-HP (Fig. 1).

| **Residue** | **HP2-PK** | | | | |  | **HP2-HP** | | | | |
| --- | --- | --- | --- | --- | --- | --- | --- | --- | --- | --- | --- |
|  | H1' | H2/5 | H6/8 | H1/3  (0 °C) | C2/5 |  | H1' | H2/5 | H6/8 | H1/3  (0 °C) | C2/5 |
| A1 | 6.04 | 7.65 | 8.51 |  | 153.66 |  | 5.82 | 7.73 | 8.41 |  | - |
| U2 | 5.52 | 5.02 | 7.77 | 14.21 | 102.60 |  | 5.51 | 4.96 | 7.73 | 14.13 | 102.50 |
| C3 | 5.53 | 5.58 | 7.79 |  | 97.83 |  | 5.51 | 5.56 | 7.77 |  | 97.77 |
| C4 | 5.37 | 5.44 | 7.63 |  | 98.21 |  | 5.32 | 5.36 | 7.54 |  | 98.08 |
| A5 | 5.78 | 7.19 | 7.80 |  | 152.96 |  | 5.81 | 7.41 | 8.01 |  | 154.16 |
| G6 | 5.28 | - | 7.44 |  | - |  | 5.43 | - | 7.36 |  | - |
| A7 | 5.51 | 7.58 | 7.90 |  | 154.26 |  | 5.66 | 7.84 | 8.19 |  | 154.56 |
| A8 | 5.62 | - | 8.01 |  | - |  | - | - | 7.99 |  | - |
| A9 | 5.67 | 7.92 | - |  | 155.06 |  | 5.82 | 7.98 | - |  | - |
| C10 | 5.78 | 5.83 | 7.62 |  | 99.21 |  | 5.13 | 5.63 | 7.64 |  | 98.44 |
| G11 | 5.56 | - | 7.78 |  | - |  | 5.47 | - | 7.65 | 11.93 | - |
| G12 | 5.70 | - | 7.90 |  | - |  | - | - | 7.27 | 12.45 | - |
| A13 | 5.86 | 8.02 | 8.10 |  | 155.26 |  | 5.90 | 7.74 | 7.64 |  | - |
| U14 | 4.90 | 5.68 | 7.70 | 13.55 | 104.60 |  | 5.36 | 5.11 | 7.29 | 13.40 | 105.30 |
| G15 | 5.78 | - | 7.71 | 11.82 | - |  | 5.47 | - | 7.56 |  | - |
| G16 | 5.62 | - | 7.17 | 12.37 | - |  | 5.41 | - | 7.57 |  | - |
| A17 | 5.90 | 7.74 | 7.66 |  | 153.96 |  | 5.87 | 7.99 | 8.15 |  | - |
| U18 | 5.43 | 4.98 | 7.37 | 13.40 | 103.20 |  | 5.72 | 5.59 | 7.61 |  | 105.00 |
| A19 | 5.92 | 7.36 | 8.07 |  | 154.56 |  | 5.94 | 8.02 | 8.25 |  | - |
