# Supplementary material
Source: HighWire-hosted journal article supplement (doi:10.1101/rna.078951.121)
Supplement: Supplemental_Table_S3.docx [file Supplemental_Table_S3.docx]

**Supplemental Table S3)**

Chemical shifts of HP2:Oligo1 at 20°C in D2O (non-exchangeable), and 0 °C in 95%H2O/5%D2O (exchangeable). Not shown: LC5m21 methyl at 1.48 ppm.

| **Residue** | **Atom ID** | | | | | | | | | | |
| --- | --- | --- | --- | --- | --- | --- | --- | --- | --- | --- | --- |
|  | H1' | H2' | H3' | H4' | H5'/5'' | H6'/6'' | H2/5 | H6/8 | P | H1/3  (0 °C) | aminos  (0 °C) |
| A1 | 6.06 | 4.76 | 4.61 | 4.46 | 4.14/3.98 |  | 7.67 | 8.52 | - | - | - |
| U2 | 5.55 | 4.48 | 4.48 | - |  |  | 5.04 | 7.78 | -4.11 | 14.21 | - |
| C3 | 5.55 | 4.38 | - | - |  |  | 5.62 | 7.82 | -3.89 | - | 8.34/6.95 |
| C4 | 5.38 | 4.21 | 4.57 | 4.36 |  |  | 5.55 | 7.67 | - | - | 8.24/6.94 |
| A5 | 5.94 | 4.78 | 4.15 | 4.43 |  |  | 7.22 | 8.02 | -3.87 | - | - |
| G6 | 5.49 | 4.43 | 4.72 | 4.34 |  |  | - | 7.62 | - | 11.13 | - |
| A7 | 6.11 | 4.73 | 4.97 | 4.56 | 4.43/4.24 |  | 8.10 | 8.28 | -3.64 | - | - |
| A8 | 5.83 | 4.84 | 4.67 | 4.49 | 4.46/4.21 |  | 7.76 | 8.24 | -2.72 | - | - |
| A9 | 5.65 | 4.51 | 4.65 | 4.44 |  |  | 8.08 | 8.03 | -3.66 | - | - |
| C10 | 5.43 | 4.29 | 4.43 | 4.38 |  |  | 5.32 | 7.38 | -3.77 | - | 8.0/7.43 |
| G11 | 5.75 | 4.63 | 4.44 | 4.65 |  |  | - | 7.49 | - | 12.37 | 5.74/8.3 |
| G12 | 5.64 | 4.69 | 4.41 | 4.45 |  |  | - | 7.12 | -3.61 | 12.04 | 5.76/8.22 |
| A13 | 5.92 | 4.67 | 4.26 | - |  |  | 7.69 | 7.45 | - | - | - |
| U14 | 5.31 | 4.42 | - | - |  |  | 5.07 | 7.38 | -4.21 | 13 | - |
| G15 | 5.80 | 4.56 | 4.64 | 4.43 |  |  | - | 7.68 | - | 12.18 | 5.62/7.82 |
| G16 | 5.60 | 4.54 | - | - |  |  | - | 7.20 | - | 12.44 | 5.75/7.96 |
| A17 | 5.92 | 4.48 | - | - |  |  | 7.77 | 7.67 | - | - | 7.93/6.72 |
| U18 | 5.46 | 4.27 | 4.37 | 4.37 |  |  | 5.00 | 7.40 | - | 13.38 | - |
| A19 | 5.94 | 4.08 | 4.30 | 4.26 | 4.37/4.06 |  | 7.36 | 8.09 | -3.66 | - | - |
| omU20 | 5.84 | 4.36 | - | - |  | 3.72 | - | - | - | 13.79 | - |
| LC5m21 | 5.57 | 4.82 | 4.58 | - |  | 4.17/4.06 | - | 7.43 | - | - | 8.49/5.89 |
| omC22 | 5.71 | 4.41 | - | - |  | 3.73 | 5.34 | 7.89 | -5.44 | - | 8.11/6.42 |
| LG23 | 5.75 | 4.65 | 4.67 | 4.18 |  | 4.13/4.01 | - | 7.28 | - | 13.01 | 5.73/8.25 |
| omU24 | 5.83 | 3.82 | 4.24 | 4.18 |  | 3.58 | 5.09 | 7.79 | -5.75 | 14.13 | - |
