# Supplementary material
Source: HighWire-hosted journal article supplement (doi:10.1101/rna.078951.121)
Supplement: Supplemental_Table_S4.docx [file Supplemental_Table_S4.docx]

**Supplemental Table S4) NOE-derived restraints for HP2:Oligo1 complex.**

! REF 1 scale factor = 2305359874.691804 A1H2'-H1'

! REF 2 scale factor = 1803886264.320001 A1H4'-H1'

! REF 3 scale factor = 1200213130.638517 A13H1'-H2'

! REF 4 scale factor = 2039966212.141373 A13H2'-H1'

! REF 5 scale factor = 1810222444.560403 G15H2'-H1'

! REF 6 scale factor = 2630667468.800001 G15H4'-H1'

! REF 7 scale factor = 1940938726.115093 U18H1'-H2'

! REF 8 scale factor = 2127110399.844500 U18H2'-H1'

assign (residue 1 and name H1' ) (residue 1 and name H8 ) 3.00 0.00 1.50 ! ma

assign (residue 1 and name H1' ) (residue 19 and name H2 ) 2.50 0.00 1.50 ! ma

assign (residue 1 and name H2' ) (residue 1 and name H8 ) 3.62 0.76 0.94 !

assign (residue 1 and name H2' ) (residue 2 and name H6 ) 2.54 0.53 0.66 !

assign (residue 1 and name H8 ) (residue 1 and name H3' ) 3.24 0.68 0.84 !

assign (residue 2 and name H1' ) (residue 1 and name H2 ) 2.50 0.00 1.50 ! ma

assign (residue 3 and name H6 ) (residue 2 and name H2' ) 2.39 0.50 0.62 !

assign (residue 17 and name H2 ) (residue 3 and name H1' ) 3.24 0.68 0.84 !

assign (residue 3 and name H1' ) (residue 3 and name H2' ) 2.81 0.59 0.73 !

assign (residue 4 and name H6 ) (residue 3 and name H2' ) 2.49 0.52 0.65 !

assign (residue 4 and name H1' ) (residue 4 and name H6 ) 3.00 0.00 1.50 ! ma

assign (residue 4 and name H1' ) (residue 4 and name H2' ) 2.75 0.58 0.71 !

assign (residue 5 and name H8 ) (residue 4 and name H2' ) 2.76 0.58 0.72 !

assign (residue 5 and name H1' ) (residue 5 and name H8 ) 3.00 0.00 1.50 ! ma

assign (residue 5 and name H2' ) (residue 6 and name H8 ) 2.00 0.00 3.00 ! ma

assign (residue 5 and name H3' ) (residue 5 and name H8 ) 2.79 0.59 0.73 !

assign (residue 5 and name H3' ) (residue 6 and name H8 ) 2.00 0.00 3.00 ! ma

assign (residue 6 and name H8 ) (residue 6 and name H1' ) 3.15 0.66 0.82 !

assign (residue 6 and name H3' ) (residue 6 and name H8 ) 3.52 0.74 0.92 !

assign (residue 7 and name H1' ) (residue 7 and name H8 ) 3.00 0.00 1.50 ! ma

assign (residue 7 and name H2' ) (residue 10 and name H5 ) 4.00 0.00 50.00 ! ma

assign (residue 7 and name H8 ) (residue 7 and name H3' ) 2.89 0.61 0.75 !

assign (residue 8 and name H1' ) (residue 8 and name H8 ) 3.00 0.00 1.50 ! ma

assign (residue 8 and name H2' ) (residue 8 and name H1' ) 2.89 0.61 0.75 !

assign (residue 8 and name H2' ) (residue 8 and name H8 ) 3.70 0.78 0.96 !

assign (residue 8 and name H2' ) (residue 9 and name H8 ) 2.73 0.57 0.71 !

assign (residue 8 and name H3' ) (residue 8 and name H8 ) 3.22 0.68 0.84 !

assign (residue 8 and name H4' ) (residue 8 and name H1' ) 3.33 0.70 0.87 !

assign (residue 8 and name H2 ) (residue 9 and name H1' ) 3.39 0.71 0.88 !

assign (residue 9 and name H1' ) (residue 9 and name H8 ) 3.00 0.00 1.50 ! ma

assign (residue 9 and name H1' ) (residue 9 and name H2' ) 2.77 0.58 0.72 !

assign (residue 9 and name H2' ) (residue 9 and name H8 ) 3.49 0.73 0.91 !

assign (residue 10 and name H6 ) (residue 9 and name H2' ) 2.60 0.55 0.68 !

assign (residue 9 and name H2 ) (residue 10 and name H1' ) 3.98 0.84 1.04 !

assign (residue 10 and name H1' ) (residue 9 and name H2' ) 3.00 0.00 2.00 ! ma

assign (residue 10 and name H1' ) (residue 10 and name H6 ) 3.00 0.00 1.50 ! ma

assign (residue 10 and name H1' ) (residue 10 and name H2' ) 2.89 0.61 0.75 !

assign (residue 11 and name H8 ) (residue 10 and name H2' ) 2.50 0.52 0.65 !

assign (residue 10 and name H3' ) (residue 10 and name H1' ) 3.76 0.79 0.98 !

assign (residue 10 and name H4' ) (residue 10 and name H1' ) 3.59 0.75 0.93 !

assign (residue 10 and name H5 ) (residue 7 and name H2 ) 3.63 0.76 0.94 !

assign (residue 11 and name H1' ) (residue 11 and name H8 ) 3.00 0.00 1.50 ! ma

assign (residue 11 and name H1' ) (residue 11 and name H2' ) 2.61 0.55 0.68 !

assign (residue 12 and name H8 ) (residue 11 and name H2' ) 2.61 0.55 0.68 !

assign (residue 11 and name H3' ) (residue 11 and name H1' ) 3.35 0.70 0.87 !

assign (residue 12 and name H1' ) (residue 12 and name H8 ) 3.75 0.79 0.98 !

assign (residue 12 and name H1' ) (residue 12 and name H2' ) 2.71 0.57 0.71 !

assign (residue 13 and name H8 ) (residue 12 and name H2' ) 2.83 0.60 0.74 !

assign (residue 13 and name H1' ) (residue 13 and name H8 ) 3.00 0.00 1.50 ! ma

assign (residue 13 and name H2' ) (residue 14 and name H6 ) 2.57 0.54 0.67 !

assign (residue 13 and name H2 ) (residue 14 and name H1' ) 3.05 0.64 0.79 !

assign (residue 15 and name H8 ) (residue 14 and name H2' ) 2.00 0.00 1.50 ! ma

assign (residue 15 and name H1' ) (residue 5 and name H2 ) 3.63 0.76 0.94 !

assign (residue 15 and name H1' ) (residue 15 and name H8 ) 3.00 0.00 1.50 ! ma

assign (residue 15 and name H1' ) (residue 15 and name H2' ) 2.78 0.58 0.72 !

assign (residue 16 and name H8 ) (residue 15 and name H2' ) 2.62 0.55 0.68 !

assign (residue 16 and name H1' ) (residue 16 and name H8 ) 3.00 0.00 1.50 ! ma

assign (residue 16 and name H1' ) (residue 16 and name H2' ) 2.77 0.58 0.72 !

assign (residue 17 and name H8 ) (residue 16 and name H2' ) 2.00 0.00 1.50 ! ma

assign (residue 17 and name H8 ) (residue 17 and name H1' ) 3.91 0.82 1.02 !

assign (residue 18 and name H6 ) (residue 17 and name H2' ) 2.53 0.53 0.66 !

assign (residue 17 and name H2 ) (residue 18 and name H1' ) 3.23 0.68 0.84 !

assign (residue 18 and name H1' ) (residue 18 and name H6 ) 3.00 0.00 1.50 ! ma

assign (residue 19 and name H8 ) (residue 18 and name H2' ) 2.51 0.53 0.65 !

assign (residue 18 and name H6 ) (residue 18 and name H3' ) 2.55 0.53 0.66 !

assign (residue 19 and name H1' ) (residue 1 and name H2 ) 2.50 0.00 1.50 ! ma

assign (residue 19 and name H1' ) (residue 19 and name H2 ) 3.00 0.00 2.50 ! ma

assign (residue 19 and name H8 ) (residue 19 and name H1' ) 3.76 0.79 0.98 !

assign (residue 20 and name H1' ) (residue 20 and name H2' ) 2.81 0.59 0.73 !

assign (residue 21 and name H6 ) (residue 20 and name H2' ) 2.64 0.56 0.69 !

assign (residue 20 and name H1' ) (residue 20 and name Q6' ) 2.47 0.52 0.64 !

assign (residue 13 and name H2 ) (residue 21 and name H1' ) 3.31 0.69 0.86 !

assign (residue 21 and name H1' ) (residue 21 and name H6 ) 3.00 0.00 1.50 ! ma

assign (residue 21 and name H2' ) (residue 22 and name H6 ) 2.49 0.52 0.65 !

assign (residue 21 and name H6 ) (residue 21 and name H3' ) 2.36 0.50 0.61 !

assign (residue 6 and name H1' ) (residue 21 and name Q7 ) 3.57 0.75 0.93 ! !

assign (residue 21 and name Q7 ) (residue 6 and name H4' ) 3.40 0.00 5.00 ! ma

assign (residue 21 and name Q7 ) (residue 22 and name H5 ) 4.01 0.84 1.04 ! !

assign (residue 22 and name H1' ) (residue 22 and name H6 ) 3.00 0.00 1.50 ! ma

assign (residue 22 and name H1' ) (residue 22 and name H2' ) 2.67 0.56 0.69 !

assign (residue 23 and name H8 ) (residue 22 and name H2' ) 2.71 0.57 0.70 !

assign (residue 22 and name H5 ) (residue 21 and name H6 ) 2.00 0.00 4.00 ! ma

assign (residue 22 and name H1' ) (residue 22 and name Q6' ) 2.36 0.50 0.61 !

assign (residue 23 and name H1' ) (residue 23 and name H8 ) 3.00 0.00 1.50 ! ma

assign (residue 23 and name H1' ) (residue 23 and name H2' ) 2.52 0.53 0.66 !

assign (residue 24 and name H6 ) (residue 23 and name H2' ) 2.47 0.52 0.64 !

assign (residue 24 and name H1' ) (residue 24 and name H2' ) 2.66 0.56 0.69 !

assign (residue 24 and name H1' ) (residue 24 and name Q6' ) 2.71 0.57 0.70 !

assign (residue 3 and name H1' ) (residue 2 and name H3 ) 2.00 0.00 4.00 ! ma

assign (residue 4 and name H1' ) (residue 16 and name H1 ) 2.00 0.00 4.00 ! ma

assign (residue 5 and name H1' ) (residue 15 and name H1 ) 2.00 0.00 4.00 ! ma

assign (residue 7 and name H1' ) (residue 10 and name N4 ) 2.00 0.00 4.00 ! ma

assign (residue 10 and name H5 ) (residue 7 and name H2 ) 2.00 0.00 2.50 ! ma

assign (residue 10 and name N4 ) (residue 7 and name H2 ) 2.00 0.00 3.00 ! ma

assign (residue 16 and name H1' ) (residue 15 and name H1 ) 2.00 0.00 4.00 ! ma

assign (residue 17 and name H1' ) (residue 16 and name H1 ) 2.00 0.00 4.00 ! ma

assign (residue 22 and name H1' ) (residue 12 and name H1 ) 2.00 0.00 4.00 ! ma

assign (residue 23 and name H1' ) (residue 11 and name H1 ) 2.00 0.00 4.00 ! ma

{ A U }

assign (resid 1 and name N1 ) (resid 18 and name H3 ) 2.0 0.3 0.3

assign (resid 1 and name H61 ) (resid 18 and name O4 ) 2.0 0.3 0.3

{ U A }

assign (resid 2 and name H3 ) (resid 17 and name N1 ) 2.0 0.3 0.3

assign (resid 2 and name O4 ) (resid 17 and name H61 ) 2.0 0.3 0.3

{ C G }

assign (resid 3 and name N3 ) (resid 16 and name H1 ) 2.0 0.3 0.3

assign (resid 3 and name H41 ) (resid 16 and name O6 ) 2.0 0.3 0.3

assign (resid 3 and name O2 ) (resid 16 and name H22 ) 2.0 0.3 0.3

{ C G }

assign (resid 4 and name N3 ) (resid 15 and name H1 ) 2.0 0.3 0.3

assign (resid 4 and name H41 ) (resid 15 and name O6 ) 2.0 0.3 0.3

assign (resid 4 and name O2 ) (resid 15 and name H22 ) 2.0 0.3 0.3

{ A U }

assign (resid 5 and name N1 ) (resid 14 and name H3 ) 2.0 0.3 0.3

assign (resid 5 and name H61 ) (resid 14 and name O4 ) 2.0 0.3 0.3

{ A MU3 }

assign (resid 9 and name N1 ) (resid 24 and name H3 ) 2.0 0.3 0.3

assign (resid 9 and name H61 ) (resid 24 and name O4 ) 2.0 0.3 0.3

{ C LG }

assign (resid 10 and name N3 ) (resid 23 and name H1 ) 2.0 0.3 0.3

assign (resid 10 and name H41 ) (resid 23 and name O6 ) 2.0 0.3 0.3

assign (resid 10 and name O2 ) (resid 23 and name H22 ) 2.0 0.3 0.3

{ G MRC }

assign (resid 11 and name H1 ) (resid 22 and name N3 ) 2.0 0.3 0.3

assign (resid 11 and name O6 ) (resid 22 and name H41 ) 2.0 0.3 0.3

assign (resid 11 and name H22 ) (resid 22 and name O2 ) 2.0 0.3 0.3

{ G MLC }

assign (resid 12 and name H1 ) (resid 21 and name N3 ) 2.0 0.3 0.3

assign (resid 12 and name O6 ) (resid 21 and name H41 ) 2.0 0.3 0.3

assign (resid 12 and name H22 ) (resid 21 and name O2 ) 2.0 0.3 0.3

{ A MU5 }

assign (resid 13 and name N1 ) (resid 20 and name H3 ) 2.0 0.3 0.3

assign (resid 13 and name H61 ) (resid 20 and name O4 ) 2.0 0.3 0.3

un-NOEs

assign (resid 11 and name H8 ) (resid 7 and name H2 ) 4.0 0.0 50.0

assign (resid 9 and name H8 ) (resid 7 and name H1' ) 4.0 0.0 50.0
